# Supplementary material
Source: publisher site journal article supplement (https://www.dovepress.com/get_supplementary_file.php?f=267459.docx)
Supplement: Supplementary file 1 [file get_supplementary_file.php]

Were You given enough privacy when discussing your treatment?

1. Yes
2. NO

Did doctors talk in front of you as if you weren’t there?

1. Yes, often
2. Yes, sometimes
3. NO

If you needed to talk to a doctor, did you get the opportunity to do so?

1. Yes, often
2. Yes, sometimes
3. NO
4. I had no need to talk to doctor

Did you want to be more involved in decisions about your care?

1. Yes, often
2. Yes, sometimes
3. NO

Sometimes in hospital one doctor or nurse will say one thing and another will say something quite different. Did this happen to you?

1. Yes, often
2. Yes, sometimes
3. NO

**Appendix 1.** Questions were added in the questionnaire. Black boxes indicate responses coded as a “problem”.
